# Supplementary material for: Factors associated with the awareness of vaginal fistula among women of reproductive age: findings from the 2018 Nigerian demographic health cross-sectional survey
Source: PubMed Central journal article supplement — BMJ Open. 2020 Nov 12;10(11):e040078. doi: 10.1136/bmjopen-2020-040078 (PMC7662540; doi:10.1136/bmjopen-2020-040078), 2020-11-12
Supplement: bmjopen-2020-040078supp001.pdf [file bmjopen-2020-040078supp001.pdf]

**Box 1: Fistula Module questions asked in the 2018 NDHS data**

| S/N | Questions                                                                                                                                                                                                                                                                                                                                                     | Denominator                      |
|-----|---------------------------------------------------------------------------------------------------------------------------------------------------------------------------------------------------------------------------------------------------------------------------------------------------------------------------------------------------------------|----------------------------------|
| 1.  | Sometimes a woman can have a problem of constant leakage of urine or stool from her vagina during the day and night. This problem usually occurs after a difficult childbirth but may also occur after a sexual assault or after pelvic surgery.<br>Have you ever experienced a constant leakage of urine or stool from your vagina during the day and night? | No=26535<br>Yes=50<br>N=26585    |
| 2.  | <b>Have you ever heard of this problem?</b>                                                                                                                                                                                                                                                                                                                   | Yes=13469<br>No=13066<br>N=26535 |
| 3.  | Did this problem start after you delivered a baby or had a stillbirth                                                                                                                                                                                                                                                                                         | 50                               |
| 4.  | Did this problem start after a normal labor and delivery, or after a very difficult labor and delivery?                                                                                                                                                                                                                                                       | 40                               |
| 5.  | What do you think caused this problem?                                                                                                                                                                                                                                                                                                                        | 10                               |
| 6.  | How many days after (cause of problem from 3 or 5) did this leakage start?                                                                                                                                                                                                                                                                                    | 45                               |
| 7.  | How old were you when you experienced this problem?                                                                                                                                                                                                                                                                                                           | 50                               |
| 8.  | Have you sought treatment for this condition?                                                                                                                                                                                                                                                                                                                 | 50                               |
| 9.  | Why have you not sought treatment?                                                                                                                                                                                                                                                                                                                            | Nil                              |
| 10. | From whom did you last seek treatment?                                                                                                                                                                                                                                                                                                                        | 41                               |
| 11. | Did you have an operation to fix the problem?                                                                                                                                                                                                                                                                                                                 | 41                               |
| 12. | Did the treatment stop the leakage completely?<br>IF NO: did the treatment reduce the leakage?                                                                                                                                                                                                                                                                | 41                               |
| 13. | Are there any (other) women in your household who suffer from obstetric fistula?                                                                                                                                                                                                                                                                              | Nil                              |
| 14. | How many (other) women in your household suffer from obstetric fistula?                                                                                                                                                                                                                                                                                       | No observation                   |

**Questions 1, 3-14** were answered by participants that had experienced vaginal fistula; **Question 2** was answered by all women
